# Supplementary material for: Seasonal variation in haematological and biochemical reference values for healthy young children in The Gambia
Source: Springer Nature journal article supplement (doi:10.1186/s12887-016-0545-6), 2016-01-11

**A. WBC (red curve: median, blue curve: 2.5<sup>th</sup> and black curve: 97.5<sup>th</sup>)**

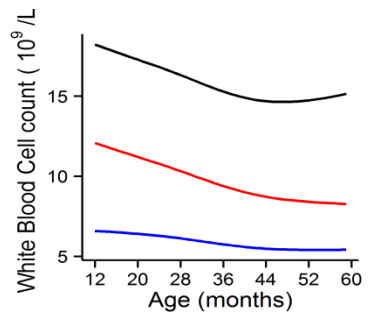

Female in dry season

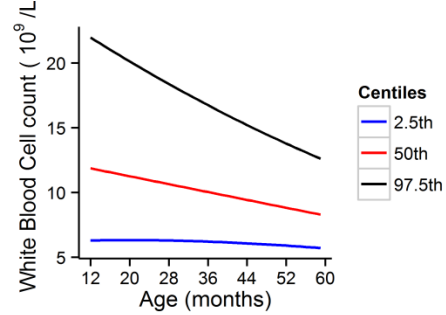

Female in wet season

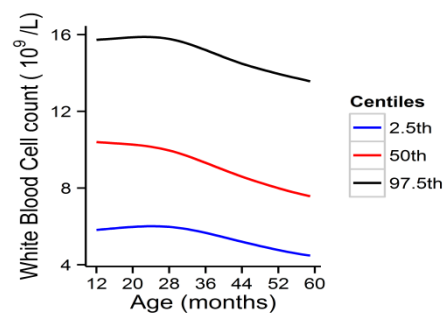

Male in dry season

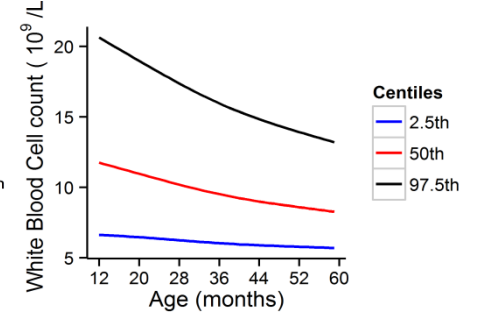

Male in wet season

**B. Lymphocyte (red curve: median, blue curve: 2.5<sup>th</sup> and black curve: 97.5<sup>th</sup>)**

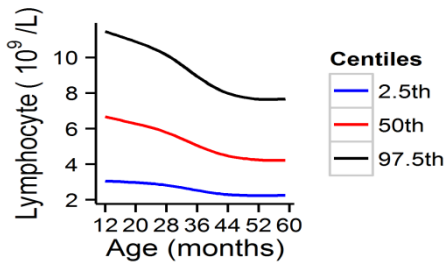

In dry season

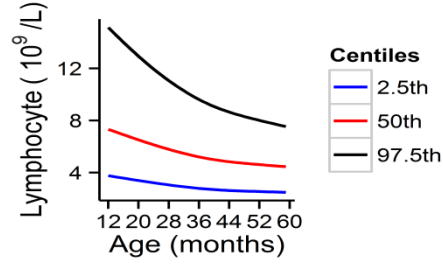

In wet season

**C. Monocyte (red curve: median, blue curve: 2.5<sup>th</sup> and black curve: 97.5<sup>th</sup>)**

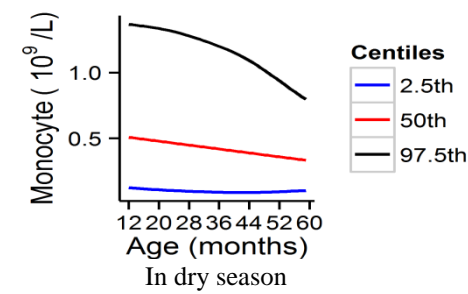

In dry season

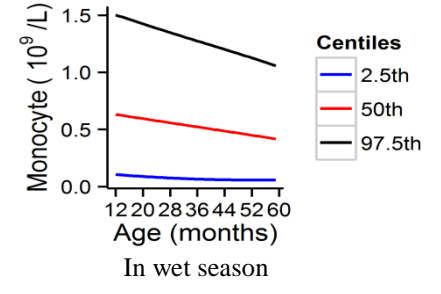

In wet season

**D. Neutrophils (red curve: median, blue curve: 2.5<sup>th</sup> and black curve: 97.5<sup>th</sup>)**

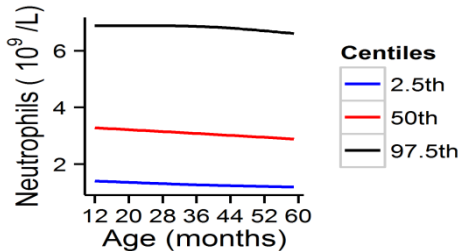

Female in dry season

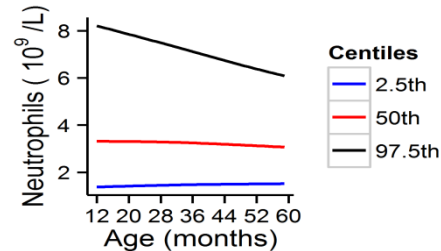

Female in wet season

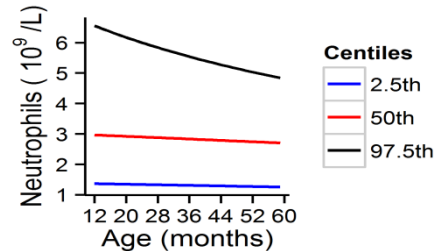

Male in dry season

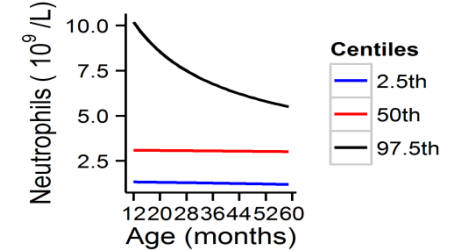

Male in wet season

**E. Eosinophils (red curve: median, blue curve: 2.5<sup>th</sup> and black curve: 97.5<sup>th</sup>, all seasons and gender)**

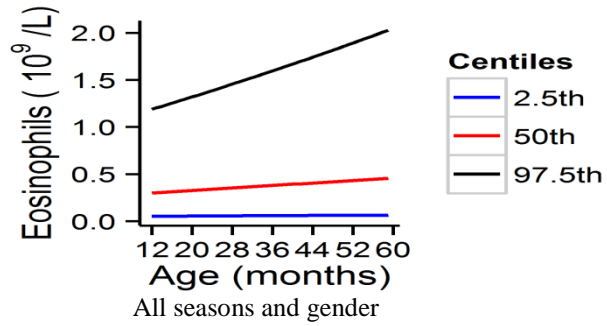

**F. Haemoglobin (red curve: median, blue curve: 2.5<sup>th</sup> and black curve: 97.5<sup>th</sup>)**

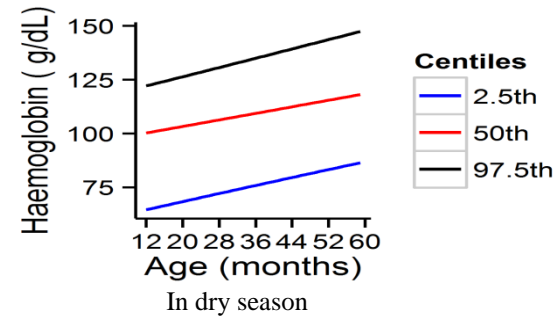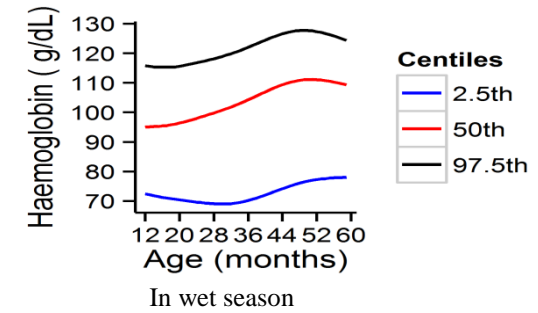

**G. Platelets (red curve: median, blue curve: 2.5<sup>th</sup> and black curve: 97.5<sup>th</sup>)**

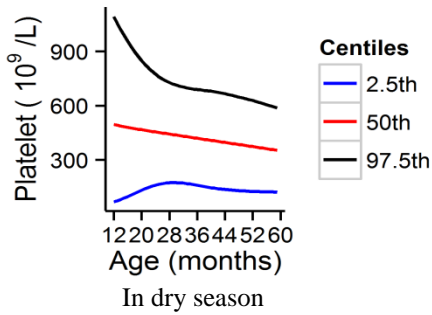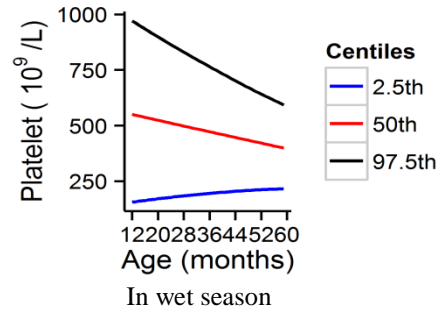

**H. Sodium (red curve: median, blue curve: 2.5<sup>th</sup> and black curve: 97.5<sup>th</sup>)**

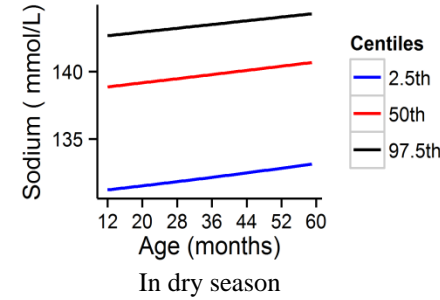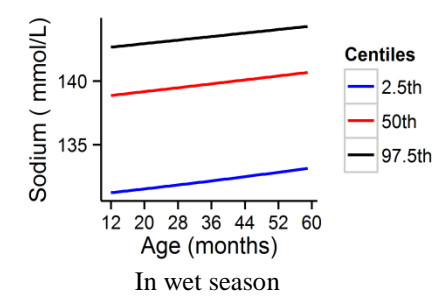

**I. Potassium (red curve: median, blue curve: 2.5<sup>th</sup> and black curve: 97.5<sup>th</sup>)**

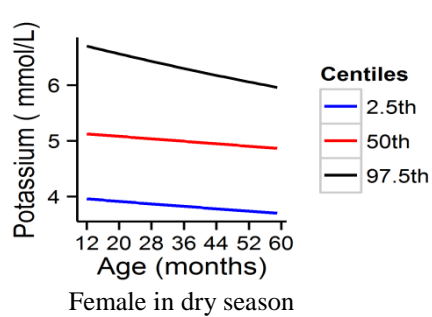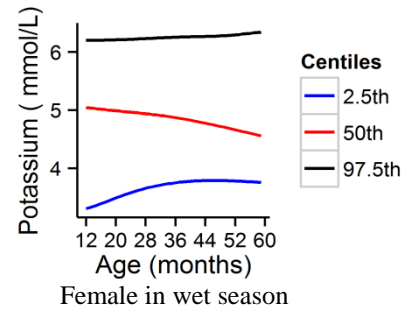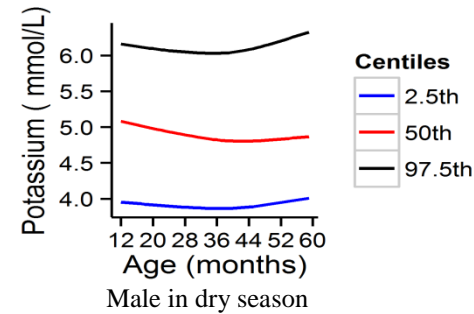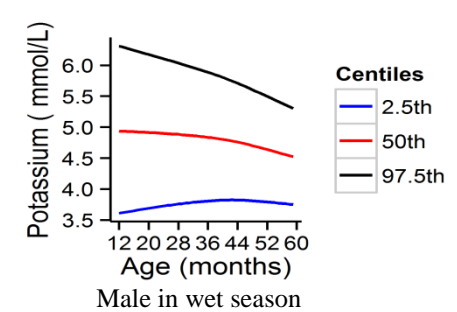

**J. Urea (red curve: median, blue curve: 2.5<sup>th</sup> and black curve: 97.5<sup>th</sup>)**

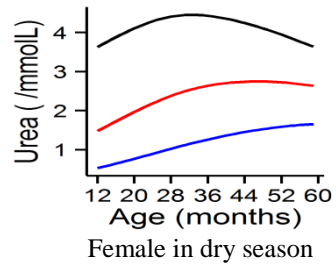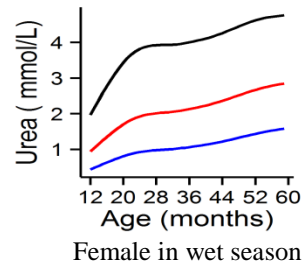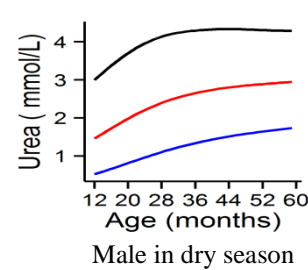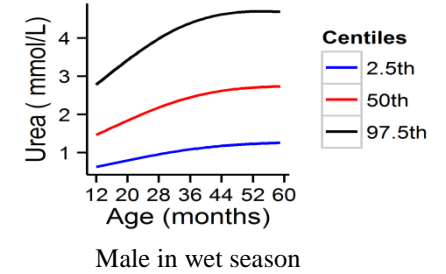

**K. Creatinine (red curve: median, blue curve: 2.5<sup>th</sup> and black curve: 97.5<sup>th</sup>)**

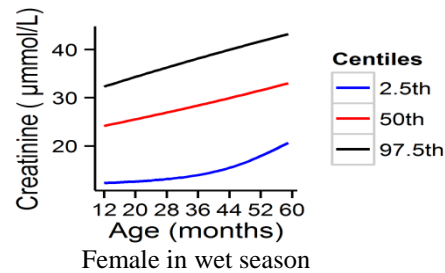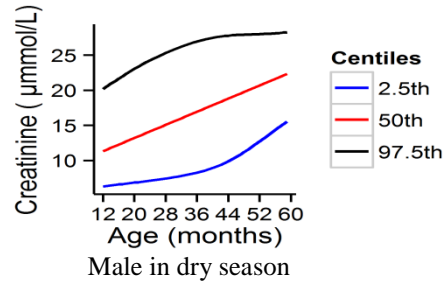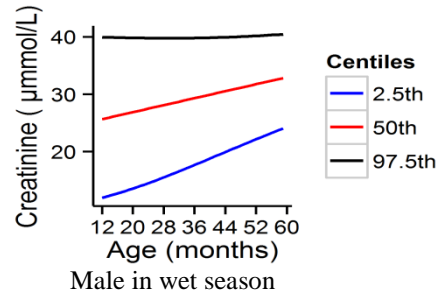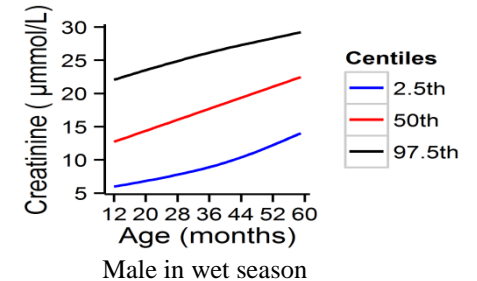

**L. AST (red curve: median, blue curve: 2.5<sup>th</sup> and black curve: 97.5<sup>th</sup>)**

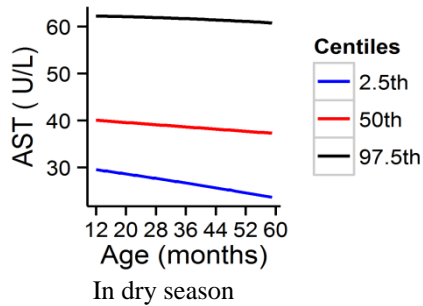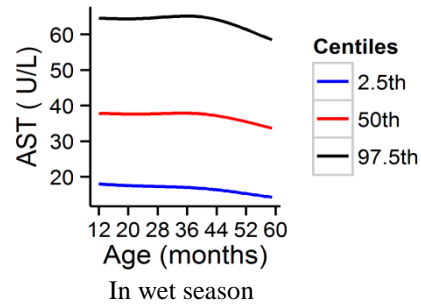

**M. ALT (red curve: median, blue curve: 2.5<sup>th</sup> and black curve: 97.5<sup>th</sup>)**

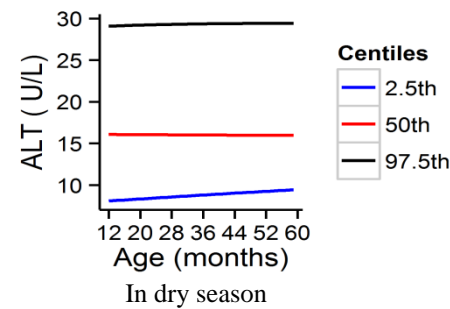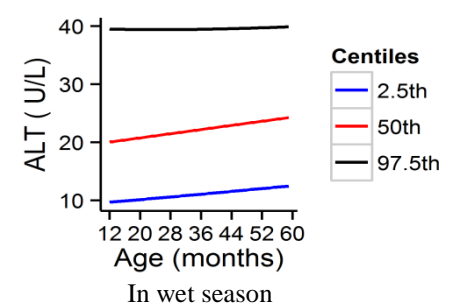

N. Albumin (red curve: median, blue curve: 2.5<sup>th</sup> and black curve: 97.5<sup>th</sup>)

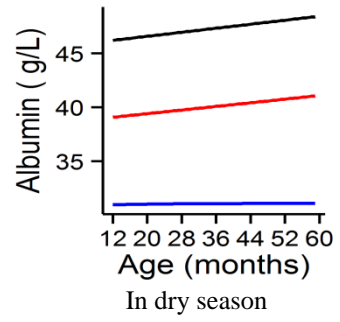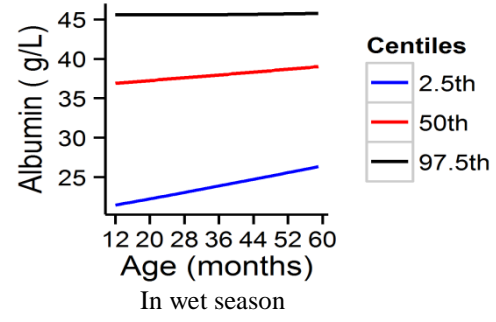

Supplement: MOESM2 [file 9747282]
